# Supplementary material for: The laccase-like reactivity of manganese oxide nanomaterials for pollutant conversion: rate analysis and cyclic voltammetry
Source: PubMed Central journal article supplement (PMC5552746; doi:10.1038/s41598-017-07913-2), 2017-08-10
Supplement: 41598_2017_7913_MOESM1_ESM.pdf [file 41598_2017_7913_MOESM1_ESM.pdf]

## Supplementary data

### **The laccase-like reactivity of manganese oxide nanomaterials for pollutant conversion: rate analysis and cyclic voltammetry**

Xinghao Wang<sup>a,b</sup>, Jiaoqin Liu<sup>a</sup>, Ruijuan Qu<sup>a\*</sup>, Zunyao Wang<sup>a</sup>, Qingguo Huang<sup>b\*</sup>

<sup>a</sup> State Key Laboratory of Pollution Control and Resources Reuses, School of the Environment, Nanjing University, Nanjing 210023, P. R. China

<sup>b</sup> College of Agricultural and Environmental Sciences, Department of Crop and Soil Sciences, University of Georgia, Griffin, Georgia 30223, United States

\*Correspondence and requests for materials should be addressed to R.Q. (email: quruijuan0404@nju.edu.cn) and Q.H. (email: qhuang@uga.edu)

Number of pages (including this page): 18

Number of Texts: 4

Number of Figures: 8

Number of Tables: 3

## **Text S1. Synthesis of MnO<sub>x</sub> Materials**

The five different crystalline MnO<sub>x</sub> were prepared by typical hydrothermal methods according to previously reported procedures (Pokhrel et al., 2015).

1. Synthesis of  $\alpha$ -MnO<sub>2</sub>. KMnO<sub>4</sub> (1.94 g) and MnSO<sub>4</sub> (0.845 g) were dissolved separately in ten milliliter of H<sub>2</sub>O and then combined in a Teflon-lined autoclave. The solution was heated at 160 °C for 12 hours. The resulting product was centrifuged, decanted and washed with H<sub>2</sub>O to remove unwanted ions. The solid was dried in air.

2. Synthesis of  $\beta$ -MnO<sub>2</sub>. In a typical procedure, MnCl<sub>2</sub> (0.475 g) and KMnO<sub>4</sub> (0.2528 g) were dissolved separately in 10 mL H<sub>2</sub>O. The solutions were mixed together and stirred for 1 hour. The stirred solution was heated in a Teflon-lined autoclave at 180 °C for 48 hours. The resulting solid was washed with H<sub>2</sub>O and dried at 180 °C for 18 hours.

3. Synthesis of  $\gamma$ -MnO<sub>2</sub>. MnSO<sub>4</sub> H<sub>2</sub>O (4.25 g) and KMnO<sub>4</sub> (1.715 g) were ground together until evenly mixed. The mixture was dissolved in 100 mL of H<sub>2</sub>O with stirring and 50 mL of 1 M H<sub>2</sub>SO<sub>4</sub> was added. The reaction mixture was stirred for 20 hours at room temperature. The solution was centrifuged, decanted and washed once with ethanol and twice with H<sub>2</sub>O. The solid was dried at 70 °C overnight.

4. Synthesis of  $\delta$ -MnO<sub>2</sub>. A 1.4 M aqueous glucose solution was added to a 0.38 M aqueous KMnO<sub>4</sub> solution in a 2:5 ratio, forming a brown gel. Water was periodically drained over 2 hours as the gel underwent syneresis. The gel was then dried at 110 °C for 24 hours followed by calcination at 400 °C for 2 hours. The resulting powder was washed

with H<sub>2</sub>O to remove impurities and dried at 90 °C.

5. Synthesis of Mn<sub>3</sub>O<sub>4</sub>. An 80% hydrazine solution (5 mL) was added dropwise to an aqueous solution of 0.2 M KMnO<sub>4</sub> (20 mL), and the solution was stirred at room temperature for 12 hours. The resulting solid was centrifuged, decanted, washed with H<sub>2</sub>O, and dried at 110 °C for 10 hours.

## **Text S2. Mn(II) determination**

The formaldoxime spectrophotometric method (Morgan, 2005) was used to determine concentrations of  $\text{Mn}^{2+}(\text{aq})$ . The study followed a modified procedure as follows: Two mL of the sample suspension was prior pipetted and filtered using the microfilter to remove the manganese oxide particles. Then one mL of filtrate placed into a 15 mL tube for Mn(II) determination. The volume of the tube was adjusted to 6 mL, and the following reagents were added: 1mL of 1 M EDTA solution, 1.2 mL of formaldoxime reagent (stock prepared by dissolving hydroxylamine hydrochloride in MilliQ doubly-distilled water, adding 37% formaldehyde solution, and making to volume), 3 mL of 5 M NaOH, and MilliQ water for a final volume of 15 mL. Standards of 0.1, 0.2, 0.4, 0.6, 1.0, and 3.0 ppm Mn are prepared by dilution from a 1000 ppm stock Mn(II) solution. Blanks, standards, and samples are analyzed for absorbance at 450 nm in a Beckman DU 800 spectrophotometer.

### **Text S3. HPLC analysis for E2**

E2 concentration was quantified using a HPLC (Shimadzu LC 20TA) equipped with a C18 column (25 cm×4.6 mm, 5 μm particle, Supelco) and a diode array detector (SPD-M20A) at 40 °C. The flow rate was set at 0.8 mL min<sup>-1</sup>, the injection volume was 20 μL, and the gradient was programmed as following: 20 min, 40% ACN; 30 min, 100% ACN; 31 min, 100% ACN; 35 min, 40% ACN.

#### **Text S4. HPLC-MS/MS analysis for E2**

The intermediates and products of E2 reaction with manganese oxides were identified elaborately using a high resolution hybrid quadrupole time-of-flight mass spectrometer (Triple TOF 5600, AB Sciex, Foster City, CA) equipped with an electrospray ion source. The  $\gamma$ -MnO<sub>2</sub> was selected as the representative nanomaterial for E2 removal in the additional experiment. The samples were taken from the reaction system initially containing 10.0  $\mu$ M E2 and 1mM  $\gamma$ -MnO<sub>2</sub> in 100 mL acetate buffer (pH 4.0, 10 mM) with pH 4.0 after 0.5, 1, 2, 4, and 6 h of reaction, and control samples that didn't contain  $\gamma$ -MnO<sub>2</sub>. The HPLC-MS condition are provided below in detail. A 5  $\mu$ L sample was injected into the source using an Agilent 1260 infinity high performance liquid chromatography (HPLC) system. Chromatographic separation was performed on a Thermo BDS Hypersil C<sub>18</sub> column (2.1 mm  $\times$  100 mm, particle size: 2.4  $\mu$ m; Thermo Fisher Scientific, Waltham, MA) maintained at 30  $^{\circ}$ C, and the mobile phase consisting of 0.3% formic acid in water (A) and methanol (B) was eluted at a flow rate of 0.2 mL/min. The linear gradient was decreased from 90 % A (2 min) to 10 % A in 1 min, maintained for 23 min, then returned to the starting condition in 1 min, followed by an 8 min equilibration. Mass spectra (m/z 70-1000) were recorded in negative ion mode by using an electrospray ion (ESI) source with the following ion source parameters: ion source gas 1, -55 psi; ion source gas 2, -55 psi; curtain gas, -35 psi; temperature, 550  $^{\circ}$ C; ionspray voltage floating, -4500 V; declustering potential, -80 V; collision energy, -10 V. Nitrogen

gas was used throughout. Following the MS analysis, the individual parent ions of the possible transformation products of E2 were manually selected for MS/MS analysis. A sweeping collision energy setting of  $-30 \pm 10$  V was applied for collision-induced dissociation. The high-resolution LC-MS data were acquired with Analyst TF software (Version 1.6, AB Sciex) and processed using PeakView software (Version 1.2, AB Sciex).

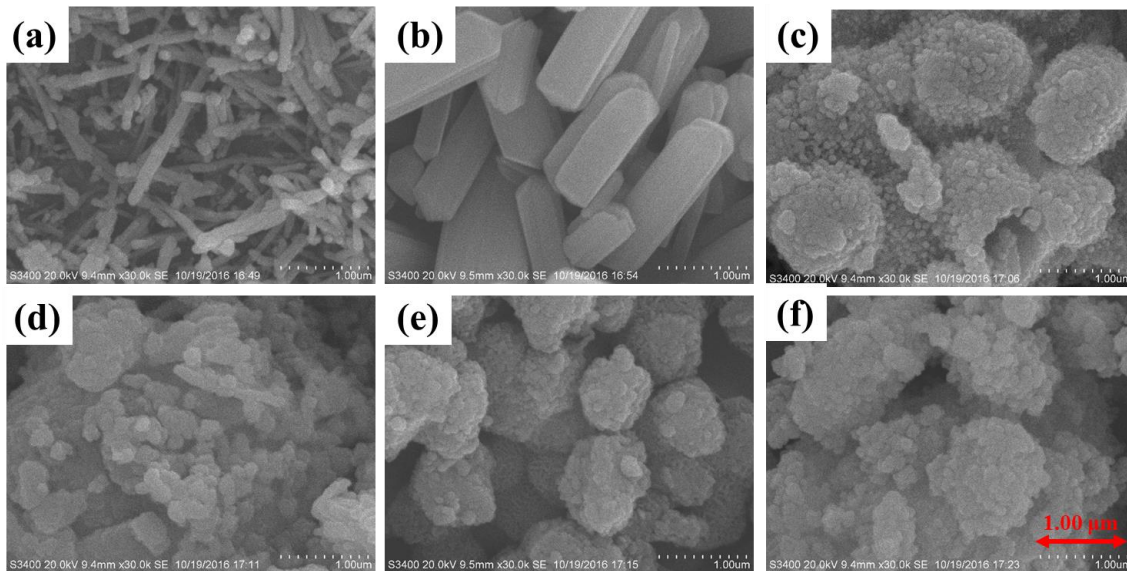

**Fig. S1.** FE-SEM images of  $\text{MnO}_x$  nanomaterials (a:  $\alpha\text{-MnO}_2$ ; b:  $\beta\text{-MnO}_2$ ; c:  $\gamma\text{-MnO}_2$ ; d:  $\delta\text{-MnO}_2$ ; e:  $\epsilon\text{-MnO}_2$ ; and f:  $\text{Mn}_3\text{O}_4$ ) (bar 1.00  $\mu\text{m}$ ).



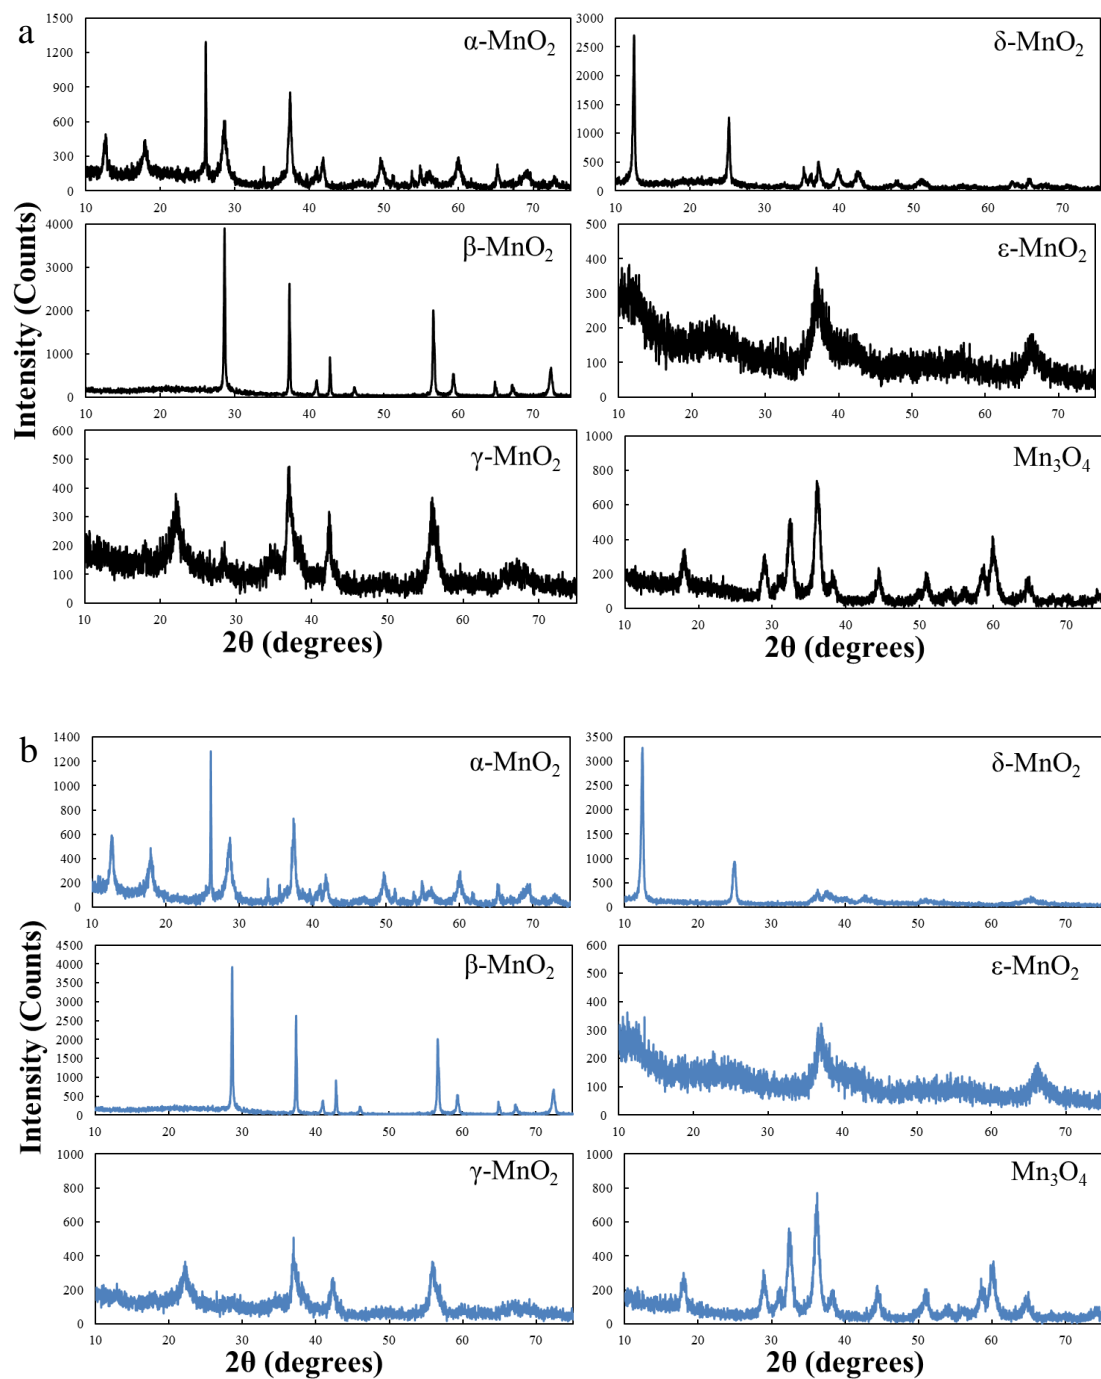

**Fig. S2.** Powder X-ray diffraction patterns of six MnO<sub>x</sub> nanomaterials (a) before and (b) after oxidation with E2.

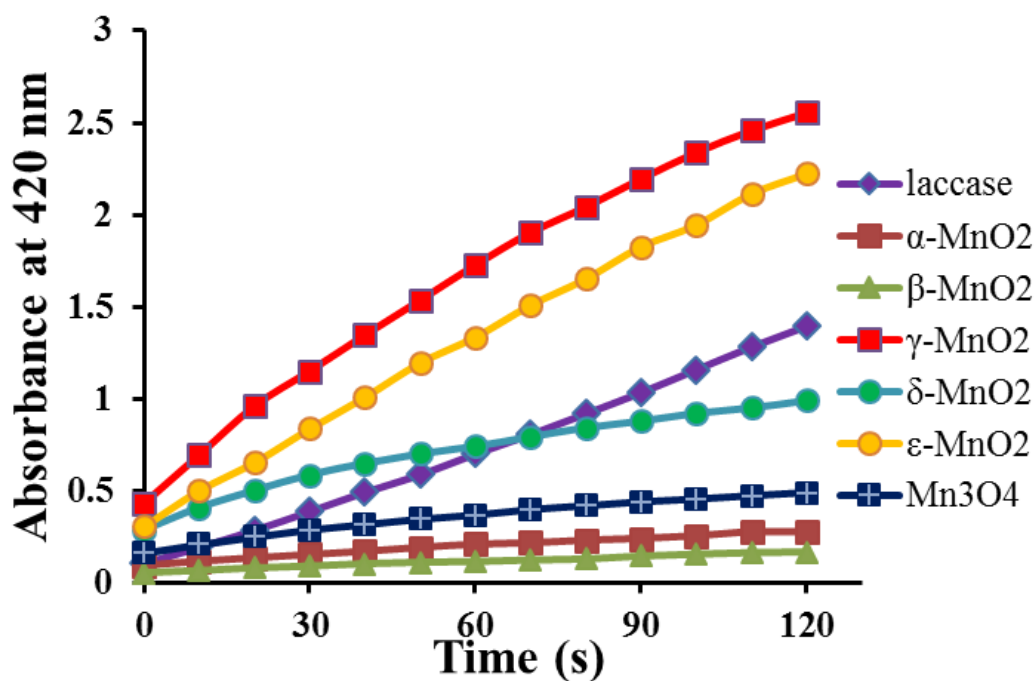

**Fig. S3.** The oxidation of ABTS (2 mM) by laccase (5 mg/mL) and different MnO<sub>x</sub> (5 mg/mL) at pH 6.0. The result shows that the reaction rates of  $\gamma$ -MnO<sub>2</sub> (the red line) and  $\epsilon$ -MnO<sub>2</sub> (the yellow line) are greater than the natural laccase (the purple line).

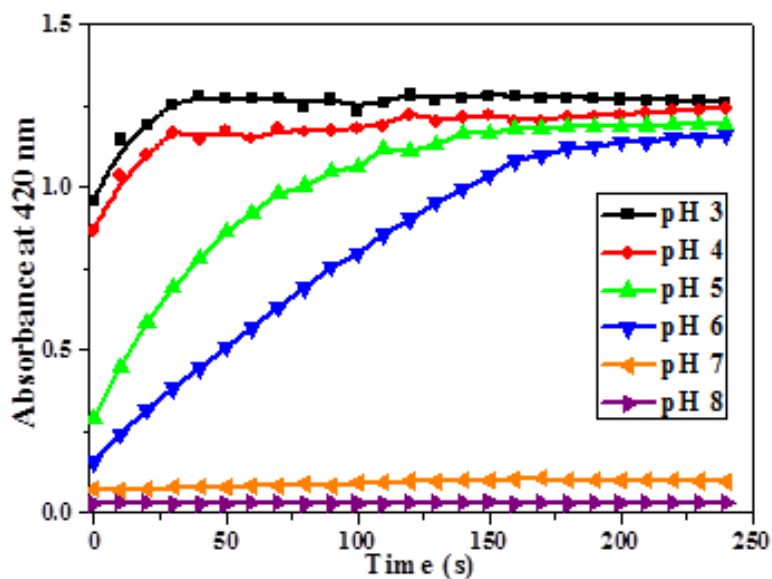

**Fig. S4.** The oxidation of ABTS (2 mM) by  $\gamma$ -MnO<sub>2</sub> (336  $\mu$ M) under different pH. The initial reaction rate constant ( $k_{\text{initial}}$ ) of ABTS oxidation at different pH is obtained by fitting the data to the pseudo-first-order rate equation  $\ln (C_0/C_t) = k_{\text{initial}} t$ , where  $C_0$  is the initial concentration of ABTS, and  $C_t$  is the residual concentration of ABTS at reaction time  $t$ .

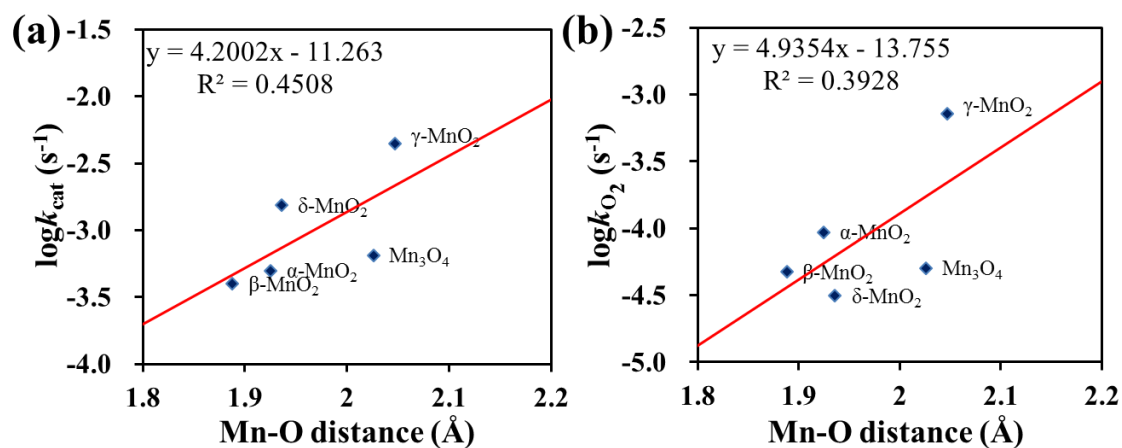

**Fig. S5.** (a) The relationship between  $\log k_{cat}$  of ABTS initial reaction and the Mn-O bond length in different MnO<sub>x</sub> nanomaterials. (b) The relationship between  $\log k_{O_2}$  of ABTS oxidation and the Mn-O bond length of different MnO<sub>x</sub> nanomaterials.

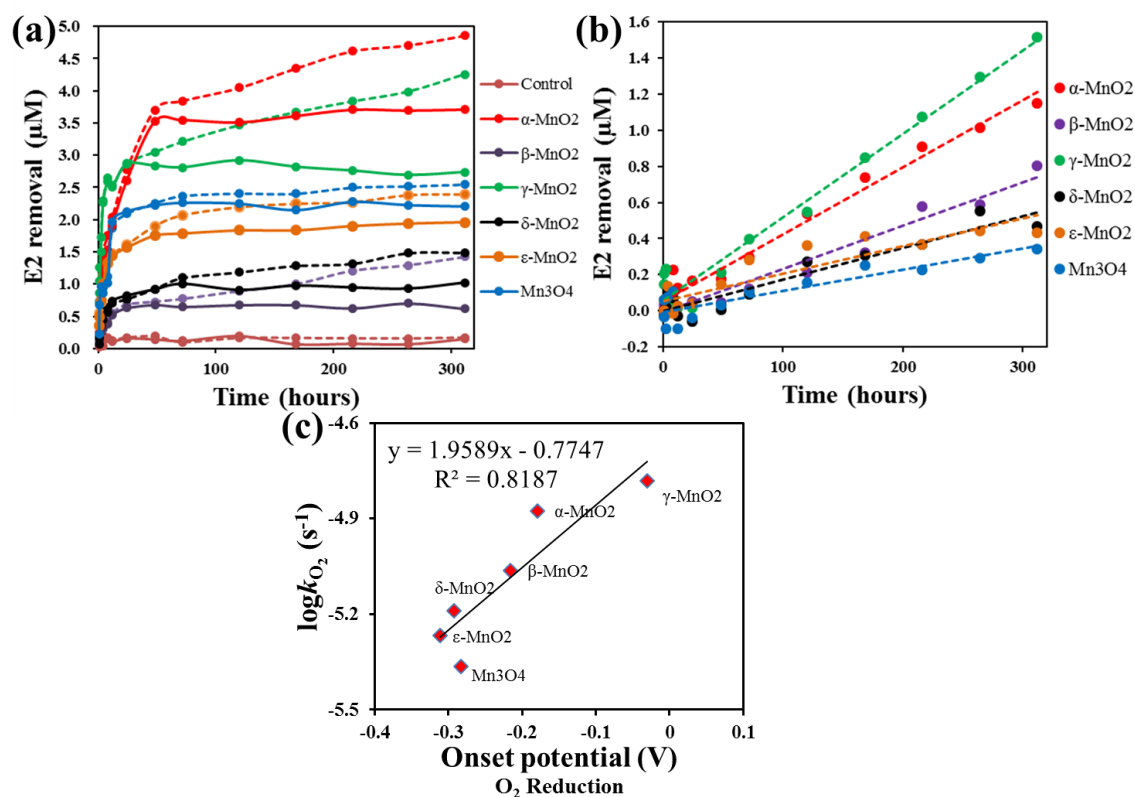

**Fig. S6.** (a) E2 removal by different  $\text{MnO}_x$  in systems with  $\text{O}_2$  saturated (21.5 mg/L, dash line) or depleted (0.30 mg/L, solid line). Initial conditions:  $[\text{E2}] = 10 \mu\text{M}$ ,  $[\text{MnO}_x] = 2.0 \mu\text{M}$ , pH 4.0. (b) The difference of E2 removal by  $\text{MnO}_x$  between the two systems tested in a. (c) The correlation between the  $\log k_{\text{O}_2}$  and the onset potential of  $\text{O}_2$  reduction by different  $\text{MnO}_x$  nanomaterials at pH 4.0.

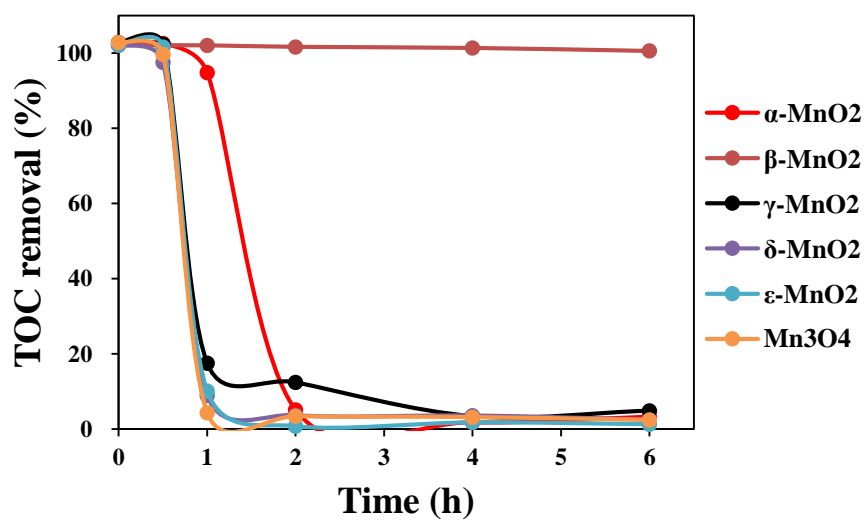

**Fig. S7.** Removal percentage rate of the TOC vs. reaction time in solution with  $E_{2_{10}}=10$   $\mu\text{M}$  in the presence of six different manganese oxides with 1.0 mM.

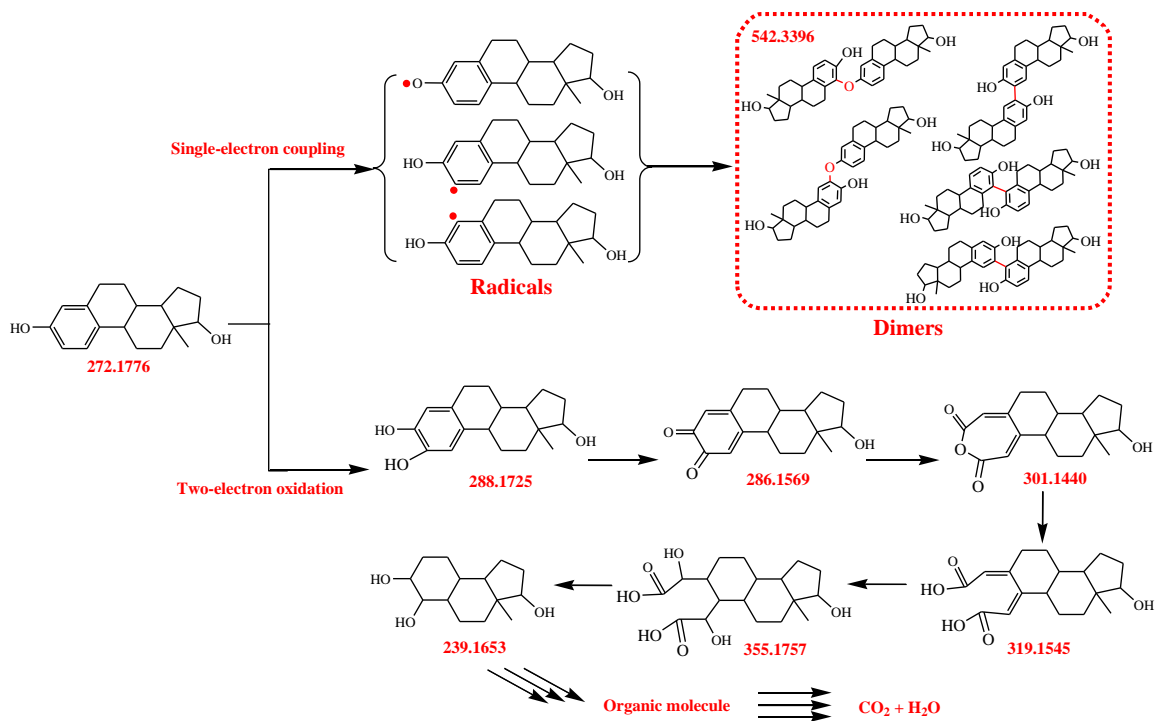

**Fig. S8.** The product intermediates and two pathways of E2 conversion in the presence of  $\gamma\text{-MnO}_2$ .

**Table S1.** Manganese oxides nanomaterials obtained under different reaction conditions.

| Sample | Phase                          | Experimental conditions                              |                                                     |        | Surface area (m <sup>2</sup> /g) |
|--------|--------------------------------|------------------------------------------------------|-----------------------------------------------------|--------|----------------------------------|
|        |                                | oxidant                                              | reductant                                           | T (°C) |                                  |
| 1      | $\alpha$ -MnO <sub>2</sub>     | KMnO <sub>4</sub>                                    | MnSO <sub>4</sub> H <sub>2</sub> O                  | 160    | 34.4                             |
| 2      | $\beta$ -MnO <sub>2</sub>      | KMnO <sub>4</sub>                                    | MnCl <sub>2</sub>                                   | 180    | 56.5                             |
| 3      | $\gamma$ -MnO <sub>2</sub>     | KMnO <sub>4</sub> and H <sub>2</sub> SO <sub>4</sub> | MnSO <sub>4</sub> H <sub>2</sub> O                  | 25     | 167.4                            |
| 4      | $\delta$ -MnO <sub>2</sub>     | KMnO <sub>4</sub>                                    | glucose                                             | 400    | 32.9                             |
| 5      | $\epsilon$ -MnO <sub>2</sub>   | no                                                   | Mn(NO <sub>3</sub> ) <sub>2</sub> 4H <sub>2</sub> O | 550    | 193.9                            |
| 6      | Mn <sub>3</sub> O <sub>4</sub> | KMnO <sub>4</sub>                                    | 80% hydrazine                                       | 25     | 49.3                             |



**Table S2.** Rate constants for the ABTS oxidation by  $\gamma$ -MnO<sub>2</sub> under different pH values.

| pH                                   | 3.0                   | 4.0                   | 5.0                   | 6.0                   | 7.0                   | 8.0                   |
|--------------------------------------|-----------------------|-----------------------|-----------------------|-----------------------|-----------------------|-----------------------|
| $k_{\text{initial}} (\text{s}^{-1})$ | $1.42 \times 10^{-3}$ | $1.57 \times 10^{-3}$ | $1.11 \times 10^{-3}$ | $5.50 \times 10^{-4}$ | $1.72 \times 10^{-5}$ | $2.66 \times 10^{-6}$ |

**Table S3.** The average Mn-O distance in selected structures of manganese oxides.

| MnO <sub>x</sub>               | Avg. Mn-O distance, Å | References              |
|--------------------------------|-----------------------|-------------------------|
| α-MnO <sub>2</sub>             | 1.925                 | (Robinson et al., 2013) |
| β-MnO <sub>2</sub>             | 1.888                 | (Robinson et al., 2013) |
| γ-MnO <sub>2</sub>             | 2.047                 | (Kohler et al., 1997)   |
| δ-MnO <sub>2</sub>             | 1.936                 | (Robinson et al., 2013) |
| ε-MnO <sub>2</sub>             | -                     | -                       |
| Mn <sub>3</sub> O <sub>4</sub> | 2.026                 | (Robinson et al., 2013) |

**References:**

- Kohler, T., Armbruster, T., Libowitzky, E., 1997. Hydrogen bonding and Jahn–Teller distortion in groutite, α-MnOOH, and manganite, γ-MnOOH, and their relations to the manganese dioxides ramsdellite and pyrolusite. *J. Solid State Chem.* 133 (2), 486-500.
- Morgan, J.J., 2005. Kinetics of reaction between O<sub>2</sub> and Mn(II) species in aqueous solutions. *Geochim. Cosmochim. Acta* 69 (1), 35-48.
- Pokhrel, R., Goetz, M.K., Shaner, S.E., Wu, X., Stahl, S.S., 2015. The “best catalyst” for water oxidation depends on the oxidation method employed: a case study of manganese oxides. *J. Am. Chem. Soc.* 137 (26), 8384-8387.
- Robinson, D.M., Go, Y.B., Mui, M., Gardner, G., Zhang, Z., Mastrogiovanni, D., Garfunkel, E., Li, J., Greenblatt, M., Dismukes, G.C., 2013. Photochemical water oxidation by crystalline polymorphs of manganese oxides: structural requirements for catalysis. *J. Am. Chem. Soc.* 135 (9), 3494-3501.
